# Supplementary material
Source: ML conference proceedings conference paper supplement (https://proceedings.neurips.cc/paper_files/paper/2014/hash/4671aeaf49c792689533b00664a5c3ef-Abstract.html)
Supplement: Supplementary file [file 4671aeaf49c792689533b00664a5c3ef-Supplemental.zip]

---

# Nonparametric Bayesian inference on multivariate exponential families

Supplementary material

---

**William Vega-Brown, Marek Doniec, and Nicholas Roy**  
 Massachusetts Institute of Technology  
 Cambridge, MA 02139  
 {wrvb, doniec, nickroy}@csail.mit.edu

## 1 Proof of the form of the extended likelihood

Consider the variational optimization problem

$$\begin{array}{ll} \underset{p}{\text{maximize}} & \mathcal{F}[p] \end{array} \quad (1)$$

$$\text{subject to} \quad \mathcal{G}_i[p] \leq 0 \quad \forall i \in [1, m] \quad (2)$$

$$\mathcal{H}_j[p] = 0 \quad \forall j \in [1, n] \quad (3)$$

where  $\mathcal{F}, \mathcal{G}_i, \mathcal{H}_j$  are functionals  $l_1(\mathcal{X}) \rightarrow \mathbb{R}$  and  $l_1(\mathcal{X})$  is the space of integrable functions over a measurable space  $\mathcal{X}$ . A solution  $p^* \in l_1(\mathcal{X})$  must satisfy the Karush-Kuhn-Tucker conditions.

$$\delta \mathcal{F}[p^*] = \sum_{i=1}^m \mu_i \delta \mathcal{G}_i[p^*] + \sum_{j=1}^n \lambda_j \delta \mathcal{H}_j[p^*] \quad (4)$$

$$\mathcal{G}_i[p^*] \leq 0 \quad \forall i \in [1, m] \quad (5)$$

$$\mathcal{H}_j[p^*] = 0 \quad \forall j \in [1, n] \quad (6)$$

$$\mu_i \geq 0 \quad \forall i \in [1, m] \quad (7)$$

$$\mu_i \mathcal{G}_i[p^*] = 0 \quad \forall i \in [1, m] \quad (8)$$

$$(9)$$

Determining the extended likelihood requires solving the problem

$$\begin{array}{ll} \underset{p}{\text{maximize}} & - \int_{\mathcal{Y}} d\mathbf{y} p(\mathbf{y}) \log p(\mathbf{y}) \end{array} \quad (10)$$

$$\text{subject to} \quad \rho(\mathbf{x}^*, \mathbf{x}) \geq \int_{\mathcal{Y}} d\mathbf{y} p(\mathbf{y}) \log \left( \frac{p(\mathbf{y})}{q(\mathbf{y})} \right)$$

$$1 = \int_{\mathcal{Y}} d\mathbf{y} p(\mathbf{y})$$

This problem has the following functionals.

$$\mathcal{F}[p] = - \int_{\mathcal{Y}} d\mathbf{y} p(\mathbf{y}) \log p(\mathbf{y}) \quad (11)$$

$$\mathcal{H}[p] = -\rho(\mathbf{x}^*, \mathbf{x}) + \int_{\mathcal{Y}} d\mathbf{y} p(\mathbf{y}) \log \left( \frac{p(\mathbf{y})}{q(\mathbf{y})} \right)$$

$$\mathcal{G}[p] = -1 + \int_{\mathcal{Y}} d\mathbf{y} p(\mathbf{y})$$

The stationarity condition is then

$$\delta\mathcal{F}[p^*] = \sum_{i=1}^m \mu_i \delta\mathcal{G}_i[p^*] + \sum_{j=1}^n \lambda_j \delta\mathcal{H}_j[p^*] \quad (12)$$

$$- \int_{\mathcal{Y}} d\mathbf{y} \delta p (\log p + 1) = \mu \int_{\mathcal{Y}} d\mathbf{y} \delta p \left( \log \frac{p}{q} + 1 \right) + \lambda \int_{\mathcal{Y}} d\mathbf{y} \delta p \quad (13)$$

$$0 = \int_{\mathcal{Y}} d\mathbf{y} \delta p \left[ \log p + 1 + \mu \left( \log \frac{p}{q} + 1 \right) + \lambda \right] \quad (14)$$

The du Bois-Reymond lemma implies the bracketed term must be zero almost everywhere.

$$0 = \log p + 1 + \mu \left( \log \frac{p}{q} + 1 \right) + \lambda \quad (15)$$

$$\log p = \frac{\mu}{1+\mu} \log q + \frac{\mu + \lambda + 1}{\mu + 1} \quad (16)$$

To satisfy the complementary slackness condition, we have either  $\mu = 0$  or  $\mathcal{G}[p^*] = 0$ . If  $\mu = 0$ , stationarity implies

$$\log p = \lambda + 1 \quad (17)$$

It follows that either  $p(\mathbf{y}) \propto 1$  or else  $\mu > 0$ .

If  $\mu > 0$ , then  $\frac{\mu}{\mu+1} \in (0, 1)$ ; moreover, the map  $f_k : a \rightarrow a^k \quad \forall a \in \mathbb{R}$  is subadditive for all  $k \in [0, 1)$ . Consequently, since  $q$  is measurable,  $q^{\frac{\mu}{1+\mu}}$  is measurable, and  $\exists \lambda \in \mathbb{R} < \infty$  such that

$$p \propto q^{\frac{\mu}{1+\mu}} \quad (18)$$

is a well-formed probability distribution with the same support as  $q$ . To ensure this solution does in fact maximize the entropy, consider the second variation.

$$\mathcal{F}[p] = - \int_{\mathcal{Y}} d\mathbf{y} p \log p \quad (19)$$

$$\mathcal{F}''[p] = - \int_{\mathcal{Y}} d\mathbf{y} \frac{1}{p} \quad (20)$$

Since  $p \geq 0$ , it follows that  $\mathcal{H}''[p] < 0 \forall \mu \geq 0$ , and thus this is a maximizing solution.

## 2 The kernel function

Consider the extended likelihood function  $p$  based on  $q$ .

$$p(\mathbf{y}) \propto q(\mathbf{y})^{k(\mathbf{x}, \mathbf{x}')} \quad (21)$$

If  $q(\mathbf{y})$  is a known distribution in the exponential family, we may rewrite this in terms of its natural parameterization.

$$p(\mathbf{y}) \propto \exp \left( k(\mathbf{x}, \mathbf{x}') \boldsymbol{\eta}^\top \mathbf{T}(\mathbf{y}) \right) \quad (22)$$

The KL divergence between two distributions in the same exponential family can be written in terms of the log-partition function  $A(\boldsymbol{\theta})$ , as described by Nielsen and Nock [1].

$$\begin{aligned} D_{\text{KL}}(p||p_0) = & A(\boldsymbol{\theta}) - A(k(\mathbf{x}, \mathbf{x}')\boldsymbol{\theta}) \\ & - (1 - k(\mathbf{x}, \mathbf{x}')) \boldsymbol{\eta}^\top \nabla A(k(\mathbf{x}, \mathbf{x}')\boldsymbol{\theta}) \end{aligned} \quad (23)$$

By construction  $k(\mathbf{x}, \mathbf{x}')$  will be chosen to enforce a bound on the KL divergence; that is,  $D_{\text{KL}}(p||p_0) = \rho(\mathbf{x}, \mathbf{x}')$ . This implicitly defines a constraint on  $k(\mathbf{x}, \mathbf{x}')$ , which must hold independent of the particular choice of  $\boldsymbol{\theta}$ .

$$\begin{aligned} \rho(\mathbf{x}, \mathbf{x}') = & A(\boldsymbol{\theta}) - A(k(\mathbf{x}, \mathbf{x}')\boldsymbol{\theta}) \\ & - (1 - k(\mathbf{x}, \mathbf{x}')) \boldsymbol{\eta}^\top \nabla A(k(\mathbf{x}, \mathbf{x}')\boldsymbol{\theta}) \end{aligned} \quad (24)$$

Consider the derivative of this expression with respect to  $k$ .

$$\frac{\partial \rho}{\partial k} = (k(\mathbf{x}, \mathbf{x}') - 1) \boldsymbol{\eta}^\top \nabla \nabla^\top A(k(\mathbf{x}, \mathbf{x}') \boldsymbol{\eta}) \boldsymbol{\eta} \quad (25)$$

Well-known properties of the log-partition function imply the Hessian of the log-partition function is the covariance of the sufficient statistic  $\mathbf{T}(\mathbf{y})$ , and is thus positive definite.

$$\nabla \nabla^\top A(\boldsymbol{\eta}) = \text{Cov}[\mathbf{T}(\mathbf{y})] \succ \mathbf{0} \quad (26)$$

This implies that  $\rho(\mathbf{x}, \mathbf{x}')$  is monotonically decreasing in  $k(\mathbf{x}, \mathbf{x}')$  in the interval  $[0, 1]$ .

$$\frac{\partial \rho(\mathbf{x}, \mathbf{x}')}{\partial k(\mathbf{x}, \mathbf{x}')} < 0 \quad \forall k(\mathbf{x}, \mathbf{x}') \in [0, 1] \quad (27)$$

Note also that we may solve for  $k$  when  $\rho = 0$ , obtaining that  $k(\mathbf{x}, \mathbf{x}') = 1$  and  $\frac{\partial \rho}{\partial k} = 0$ . Provided the maximum entropy distribution is not the constant distribution, this allows us to write  $k(\mathbf{x}, \mathbf{x}')$  as a line integral over some curve  $C$  connecting  $\mathbf{x}$  and  $\mathbf{x}'$ .

$$\begin{aligned} k(\mathbf{x}, \mathbf{x}') &= 1 + \int_C \frac{\partial k}{\partial \rho} \nabla \rho(\mathbf{x}, \mathbf{x}')^\top d\mathbf{x}' \\ &= 1 + \int_0^1 \frac{\partial k}{\partial \rho} \nabla \rho(\mathbf{x}, C(s))^\top \frac{dC}{ds} ds \end{aligned} \quad (28)$$

Evaluating this expression for arbitrary  $\rho(\mathbf{x}, \mathbf{x}')$  may be difficult; for many common distributions it cannot be done in terms of elementary functions. However, a solution exists, and conversely, if a function  $k(\mathbf{x}, \mathbf{x}') \in [0, 1]$  is specified, we may obtain an equivalent KL divergence bound.

$$\begin{aligned} \rho(\mathbf{x}, \mathbf{x}') &= \int_C \frac{\partial \rho}{\partial k} \nabla k(\mathbf{x}, \mathbf{x}')^\top d\mathbf{x}' \\ &= \int_0^1 \frac{\partial \rho}{\partial k} \nabla k(\mathbf{x}, C(s))^\top \frac{dC}{ds} ds \end{aligned} \quad (29)$$

Note that the restriction on the range of  $k(\cdot, \cdot)$  is important to ensure that  $\rho(\cdot, \cdot)$  is positive and hence a valid bound for the KL divergence. Because the computation of the posterior distribution for a kernel process depend solely on the kernel function  $k(\cdot, \cdot)$  and not on the KL bound  $\rho(\cdot, \cdot)$ , we may choose any suitable  $k(\cdot, \cdot)$  and be satisfied that an equivalent  $\rho(\cdot, \cdot)$  exists, without ever explicitly evaluating that  $\rho(\cdot, \cdot)$ .

### 3 A closed-form relation for the normal distribution

Suppose the base distribution is a normal distribution  $\mathcal{N}(\boldsymbol{\mu}, \boldsymbol{\Sigma})$ ; then the extended likelihood will also be a normal distribution with the covariance scaled by  $k$ :

$$p = \mathcal{N}\left(\boldsymbol{\mu}, \frac{1}{k} \boldsymbol{\Sigma}\right) \quad (30)$$

The Kullback-Liebler divergence between these distributions is

$$D_{\text{KL}}\left(\mathcal{N}\left(\boldsymbol{\mu}, \frac{1}{k} \boldsymbol{\Sigma}\right) \parallel \mathcal{N}(\boldsymbol{\mu}, \boldsymbol{\Sigma})\right) = \frac{1}{2} \left( \text{tr}\left(\boldsymbol{\Sigma}^{-1} \frac{1}{k} \boldsymbol{\Sigma}\right) - d - \log\left(\frac{\det \frac{1}{k} \boldsymbol{\Sigma}}{\det \boldsymbol{\Sigma}}\right) \right) \quad (31)$$

$$= \frac{d}{2} \left( \frac{1}{k} - 1 - \log \frac{1}{k} \right) \quad (32)$$

where  $d$  is the dimension of the distribution. If the divergence satisfies a bound  $\rho = \rho(\mathbf{x}, \mathbf{x}')$ , we have

$$\rho(\mathbf{x}, \mathbf{x}') = \frac{d}{2} \left( \frac{1}{k(\mathbf{x}, \mathbf{x}')} + \log \frac{1}{k(\mathbf{x}, \mathbf{x}')} - 1 \right) \quad (33)$$

This allows us to compute the equivalent bound  $\rho(\cdot, \cdot)$  for any valid kernel  $k(\cdot, \cdot)$ , and illustrates why it is important that  $k(\cdot, \cdot) \in [0, 1]$ , as kernel values outside that range result in negative or imaginary divergence bounds. The inverse relationship cannot be solved in terms of elementary functions, but has a solution in closed form in terms of the Lambert W function.

$$k(\mathbf{x}, \mathbf{x}') = -W_{-1}\left(-\exp\left(\frac{2}{d}\rho(\mathbf{x}, \mathbf{x}') + 1\right)\right) \quad (34)$$

This function is normalizable, finite, and monotonically decreasing as  $\rho$  increases, just as the differential analysis above predicts.

## References

- [1] F. Nielsen and R. Nock, “Entropies and cross-entropies of exponential families,” in *Image Processing (ICIP), 2010 17th IEEE International Conference on*. IEEE, 2010, pp. 3621–3624.
